# Supplementary material for: The Genome of the Chicken DT40 Bursal Lymphoma Cell Line
Source: PubMed Central journal article supplement (PMC4232548; doi:10.1534/g3.114.013482), 2014-09-15
Supplement: supp_g3.114.013482_013482SI.pdf [file supp_g3.114.013482_013482SI.pdf]

**The genome of the chicken DT40 bursal lymphoma cell line**

János Molnár<sup>\*</sup>, Ádám Póti<sup>\*</sup>, Orsolya Pipek<sup>§</sup>, Marcin Krzystanek<sup>†</sup>, Nnennaya Kanu<sup>‡</sup>, Charles Swanton<sup>‡</sup>, Gábor E. Tusnády<sup>\*</sup>, Zoltán Szállási<sup>†</sup>, István Csabai<sup>§</sup>, Dávid Szüts<sup>\*,1</sup>

<sup>\*</sup>Institute of Enzymology, Research Centre for Natural Sciences, Hungarian Academy of Sciences, H-1117 Budapest, Hungary, <sup>§</sup>Department of Physics of Complex Systems, Eötvös Loránd University, H-1117 Budapest, Hungary, <sup>†</sup>Center for Biological Sequence Analysis, Department of Systems Biology, Technical University of Denmark, DK-2800 Lyngby, Denmark, and <sup>‡</sup>Cancer Research UK London Research Institute, London, WCA2 3PX, UK

<sup>1</sup>Corresponding author: Institute of Enzymology, Research Centre for Natural Sciences, Hungarian Academy of Sciences, Pf. 286, H-1519 Budapest, Hungary.

E-mail: [szuts.david@ttk.mta.hu](mailto:szuts.david@ttk.mta.hu)

**DOI: 10.1534/g3.114.013482**

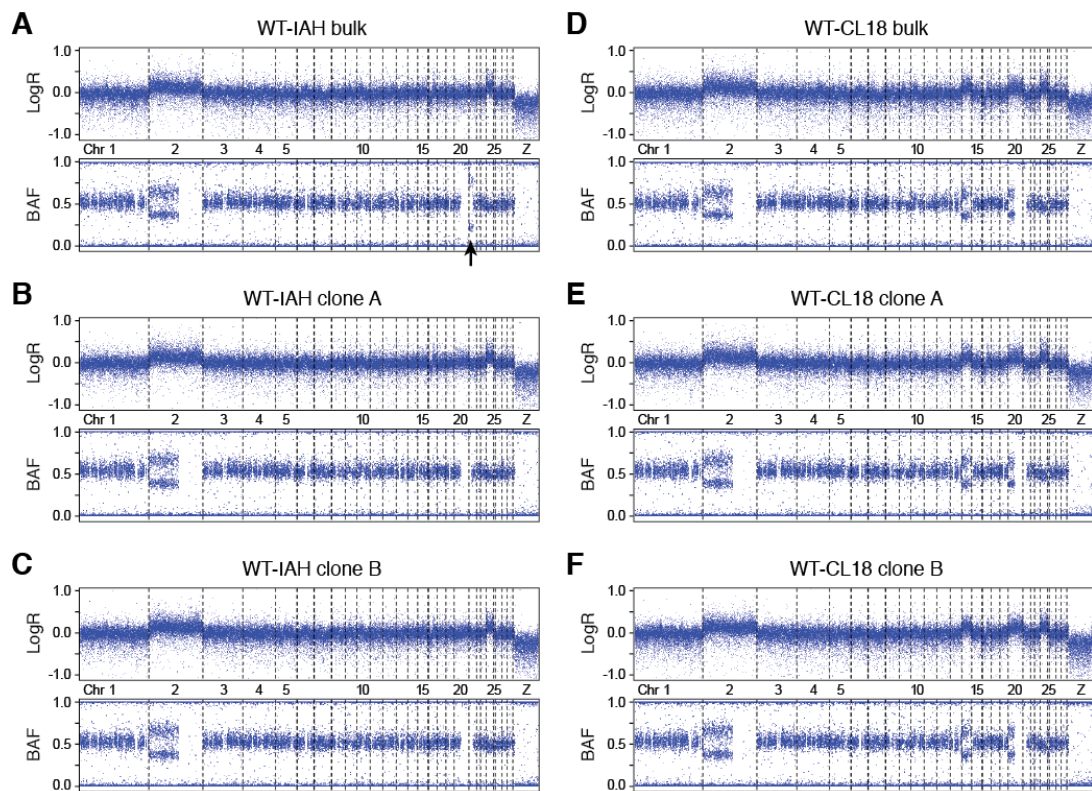

**Figure S1 SNP array hybridisation analysis of two wild type DT40 cell line stocks**

The 60,000 SNPs are lined up on the x axis in order of genomic occurrence. Chromosome boundaries are marked by dashed lines, chromosome numbers are shown between the two panels. SNPs in genomic regions unassigned to chromosomes are omitted. Top panel, signal intensity (LogR ratio, LogR); the increased copy number of chromosomes 2 and 24 is apparent. Bottom panel, B allele frequency (BAF). (A) a bulk population of the WT-IAH wild type line, with an arrow to point out partial loss of heterozygosity on chromosome 21. (B, C) two independent single cell clones of the WT-IAH wild type line. (D) a bulk population of the WT-CL18 wild type line. (E, F) two independent single cell clones of the WT-CL18 wild type line.

**Table S1 De novo assembly of 100 bp paired end reads of the DT40 cell line genome**

|                        |                   |                   |
|------------------------|-------------------|-------------------|
| <b>Number of reads</b> |                   | 634926640         |
| Contigs >=100nt        | Number            | 263483            |
|                        | Total length (nt) | <b>1000960390</b> |
|                        | Average (nt)      | 3798              |
|                        | N50 (nt)          | 9330              |
|                        | Median (nt)       | 1569              |
|                        | Largest (nt)      | 143906            |
| Contigs >=500nt        | Number            | 177396            |
|                        | Total length (nt) | <b>981176273</b>  |
|                        | Average (nt)      | 5530              |
|                        | N50 (nt)          | 9559              |
|                        | Median (nt)       | 3326              |
|                        | Largest (nt)      | 143906            |
| Scaffolds >=100nt      | Number            | 163017            |
|                        | Total length (nt) | <b>1018805696</b> |
|                        | Average (nt)      | 6249              |
|                        | N50 (nt)          | 25980             |
|                        | Median (nt)       | 406               |
|                        | Largest (nt)      | 328220            |
| Scaffolds >=500nt      | Number            | 77582             |
|                        | Total length (nt) | <b>999338724</b>  |
|                        | Average (nt)      | 12881             |
|                        | N50 (nt)          | 26540             |
|                        | Median (nt)       | 6615              |
|                        | Largest (nt)      | 328220            |

**Table S2 Regions of loss of heterozygosity in the DT40 genome**

Table S2 is available for download at <http://www.g3journal.org/lookup/suppl/doi:10.1534/g3.114.013482/-/DC1>

**Table S3 Single nucleotide variations in the DT40, Taiwan L2 and Silkie genomes**

| Mutation type                                 | DT40    | Taiwan L2 | Silkie  |
|-----------------------------------------------|---------|-----------|---------|
| All <sup>1</sup>                              | 6251553 | 6255745   | 6329640 |
| Intergenic <sup>2</sup>                       | 3226619 | 3239755   | 3282440 |
| Intergenic (Upstream w/in 1kb) <sup>3</sup>   | 89153   | 86651     | 83673   |
| Intergenic (Downstream w/in 1kb) <sup>4</sup> | 81725   | 83084     | 82473   |
| Intergenic (Up/Down w/in 1kb) <sup>5</sup>    | 6218    | 6002      | 5469    |
| Intronic <sup>6</sup>                         | 2692379 | 2683657   | 2722589 |
| Non-coding Intron <sup>7</sup>                | 18      | 4         | 17      |
| Non-coding Exon <sup>8</sup>                  | 895     | 819       | 894     |
| Non-coding splicing site <sup>9</sup>         | 2       | 1         | 1       |
| UTR5 <sup>10</sup>                            | 12514   | 11308     | 10419   |
| UTR3 <sup>11</sup>                            | 63259   | 64593     | 64219   |
| UTR5;UTR3 <sup>12</sup>                       | 73      | 104       | 66      |
| Intron splicing site <sup>13</sup>            | 369     | 382       | 363     |
| Exon splicing site <sup>14</sup>              | 1174    | 1172      | 1124    |
| Coding exon <sup>15</sup>                     | 78329   | 79385     | 77017   |
| Synonymous <sup>16</sup>                      | 54916   | 56238     | 54962   |
| Nonsynonymous <sup>17</sup>                   | 23184   | 22906     | 21851   |
| Stop Gain <sup>18</sup>                       | 175     | 167       | 157     |
| Stop Loss <sup>19</sup>                       | 27      | 29        | 29      |
| Unknown <sup>20</sup>                         | 27      | 45        | 18      |

<sup>1</sup>all filtered variants

<sup>2</sup>variant in intergenic region

<sup>3</sup>variant overlaps 1-kb region upstream of transcription start site

<sup>4</sup>variant overlaps 1-kb region downstream of transcription end site

<sup>5</sup>variant overlaps a gene

<sup>6</sup>variant overlaps an intron

<sup>7</sup>variant overlaps a transcript without coding annotation in the gene definition and overlaps an intron

<sup>8</sup>variant overlaps a transcript without coding annotation in the gene definition and overlaps the exonic region

<sup>9</sup>variant overlaps a transcript without coding annotation in the gene definition and variant is within 2-bp of a splicing junction

<sup>10</sup>variant overlaps a 5' untranslated region

<sup>11</sup>variant overlaps a 3' untranslated region

<sup>12</sup>variant overlaps a 5' untranslated region and a 3' untranslated region (e.g overlapping transcripts)

<sup>13</sup>variant overlaps an exon

<sup>14</sup>variant is within 2-bp of a splicing junction

<sup>15</sup>variant overlaps coding sequence

<sup>16</sup>variant is a silent mutation

<sup>17</sup>variant changes amino acid sequence

<sup>18</sup>variant is a nonsense mutation

<sup>19</sup>variant changes stop codon

<sup>20</sup>variant is in an incomplete ORF

**Table S4 Mutated genes in the DT40 genome**

Table S4 is available for download at <http://www.g3journal.org/lookup/suppl/doi:10.1534/g3.114.013482/-/DC1>

**File S1**

**Computer scripts used in data analysis**

File S1 is available for download at <http://www.g3journal.org/lookup/suppl/doi:10.1534/g3.114.013482/-/DC1>
