# Supplementary material for: The Genome of the Chicken DT40 Bursal Lymphoma Cell Line
Source: PubMed Central journal article supplement (PMC4232548; doi:10.1534/g3.114.013482), 2014-09-15
Supplement: supp_g3.114.013482_TableS1.pdf [file supp_g3.114.013482_TableS1.pdf]

**Table S1 De novo assembly of 100 bp paired end reads of the DT40 cell line genome**

|                        |                   |                   |
|------------------------|-------------------|-------------------|
| <b>Number of reads</b> |                   | 634926640         |
| Contigs >=100nt        | Number            | 263483            |
|                        | Total length (nt) | <b>1000960390</b> |
|                        | Average (nt)      | 3798              |
|                        | N50 (nt)          | 9330              |
|                        | Median (nt)       | 1569              |
|                        | Largest (nt)      | 143906            |
| Contigs >=500nt        | Number            | 177396            |
|                        | Total length (nt) | <b>981176273</b>  |
|                        | Average (nt)      | 5530              |
|                        | N50 (nt)          | 9559              |
|                        | Median (nt)       | 3326              |
|                        | Largest (nt)      | 143906            |
| Scaffolds >=100nt      | Number            | 163017            |
|                        | Total length (nt) | <b>1018805696</b> |
|                        | Average (nt)      | 6249              |
|                        | N50 (nt)          | 25980             |
|                        | Median (nt)       | 406               |
|                        | Largest (nt)      | 328220            |
| Scaffolds >=500nt      | Number            | 77582             |
|                        | Total length (nt) | <b>999338724</b>  |
|                        | Average (nt)      | 12881             |
|                        | N50 (nt)          | 26540             |
|                        | Median (nt)       | 6615              |
|                        | Largest (nt)      | 328220            |
