# Supplementary material for: The Genome of the Chicken DT40 Bursal Lymphoma Cell Line
Source: PubMed Central journal article supplement (PMC4232548; doi:10.1534/g3.114.013482), 2014-09-15
Supplement: supp_g3.114.013482_TableS3.pdf [file supp_g3.114.013482_TableS3.pdf]

**Table S3 Single nucleotide variations in the DT40, Taiwan L2 and Silkie genomes**

| Mutation type                                 | DT40    | Taiwan L2 | Silkie  |
|-----------------------------------------------|---------|-----------|---------|
| All <sup>1</sup>                              | 6251553 | 6255745   | 6329640 |
| Intergenic <sup>2</sup>                       | 3226619 | 3239755   | 3282440 |
| Intergenic (Upstream w/in 1kb) <sup>3</sup>   | 89153   | 86651     | 83673   |
| Intergenic (Downstream w/in 1kb) <sup>4</sup> | 81725   | 83084     | 82473   |
| Intergenic (Up/Down w/in 1kb) <sup>5</sup>    | 6218    | 6002      | 5469    |
| Intronic <sup>6</sup>                         | 2692379 | 2683657   | 2722589 |
| Non-coding Intron <sup>7</sup>                | 18      | 4         | 17      |
| Non-coding Exon <sup>8</sup>                  | 895     | 819       | 894     |
| Non-coding splicing site <sup>9</sup>         | 2       | 1         | 1       |
| UTR5 <sup>10</sup>                            | 12514   | 11308     | 10419   |
| UTR3 <sup>11</sup>                            | 63259   | 64593     | 64219   |
| UTR5;UTR3 <sup>12</sup>                       | 73      | 104       | 66      |
| Intron splicing site <sup>13</sup>            | 369     | 382       | 363     |
| Exon splicing site <sup>14</sup>              | 1174    | 1172      | 1124    |
| Coding exon <sup>15</sup>                     | 78329   | 79385     | 77017   |
| Synonymous <sup>16</sup>                      | 54916   | 56238     | 54962   |
| Nonsynonymous <sup>17</sup>                   | 23184   | 22906     | 21851   |
| Stop Gain <sup>18</sup>                       | 175     | 167       | 157     |
| Stop Loss <sup>19</sup>                       | 27      | 29        | 29      |
| Unknown <sup>20</sup>                         | 27      | 45        | 18      |

<sup>1</sup>all filtered variants

<sup>2</sup>variant in intergenic region

<sup>3</sup>variant overlaps 1-kb region upstream of transcription start site

<sup>4</sup>variant overlaps 1-kb region downstream of transcription end site

<sup>5</sup>variant overlaps a gene

<sup>6</sup>variant overlaps an intron

<sup>7</sup>variant overlaps a transcript without coding annotation in the gene definition and overlaps an intron

<sup>8</sup>variant overlaps a transcript without coding annotation in the gene definition and overlaps the exonic region

<sup>9</sup>variant overlaps a transcript without coding annotation in the gene definition and variant is within 2-bp of a splicing junction

<sup>10</sup>variant overlaps a 5' untranslated region

<sup>11</sup>variant overlaps a 3' untranslated region

<sup>12</sup>variant overlaps a 5' untranslated region and a 3' untranslated region (e.g overlapping transcripts)

<sup>13</sup>variant overlaps an exon

<sup>14</sup>variant is within 2-bp of a splicing junction

<sup>15</sup>variant overlaps coding sequence

<sup>16</sup>variant is a silent mutation

<sup>17</sup>variant changes amino acid sequence

<sup>18</sup>variant is a nonsense mutation

<sup>19</sup>variant changes stop codon

<sup>20</sup>variant is in an incomplete ORF
